# Supplementary material for: A reduced graphene oxide nanofiltration membrane intercalated by well-dispersed carbon nanotubes for drinking water purification
Source: Royal Society of Chemistry journal article supplement (doi:10.1039/c5nr08697c), 2016-01-01
Supplement: c5nr08697c1.pdf [file c5nr08697c1.pdf]

## **Electronic Supplementary Information**

### **Reduced graphene oxide nanofiltration membrane intercalated by well-dispersed carbon nanotubes for drinking water purification**

Xianfu Chen, Minghui Qiu, Hao Ding, Kaiyun Fu and Yiqun Fan\*

State Key Laboratory of Materials-Oriented Chemical Engineering, College of Chemical Engineering, Nanjing Tech University, Nanjing, 210009, P. R. China

\*Corresponding author: Tel.: +86 25 83172277; Fax: +86 25 83172292.

E-mail: yiqunfan@njtech.edu.cn

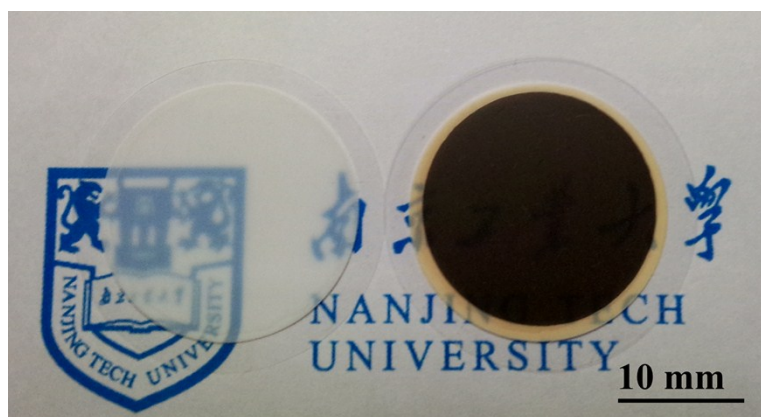

**Fig. S1** Photos of AAO substrate (left) and rGO-CNTs hybrid NF membrane (right).

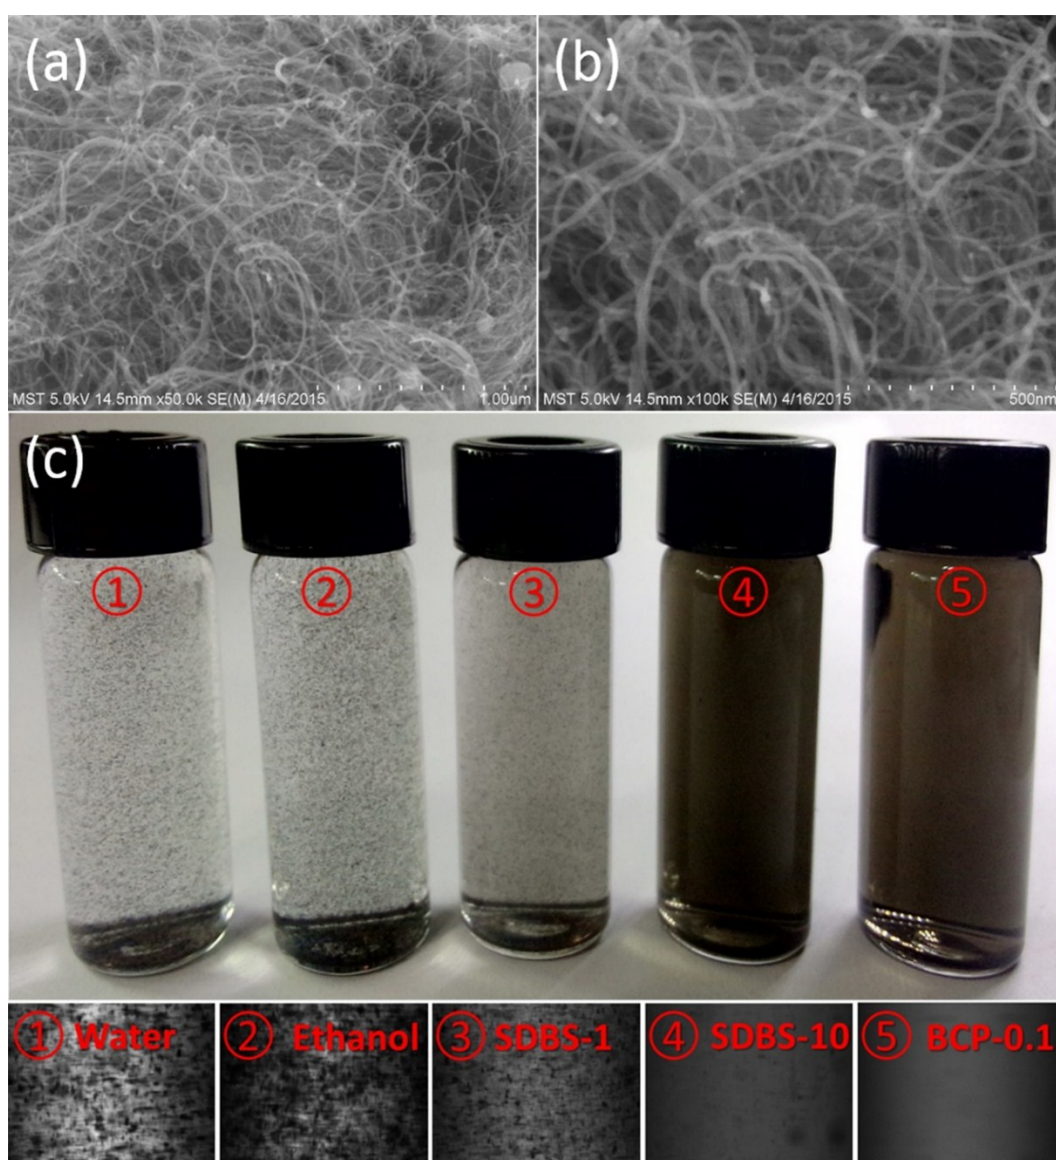

**Fig. S2** (a, b) FESEM images of CNTs. (c) Digital images of CNTs dispersions. c-1: water, c-2: ethanol, c-3: water (SDBS: CNTs=1:1), c-4: water (SDBS: CNTs=10:1), c-5: water (BCPs: CNTs=0.1:1).

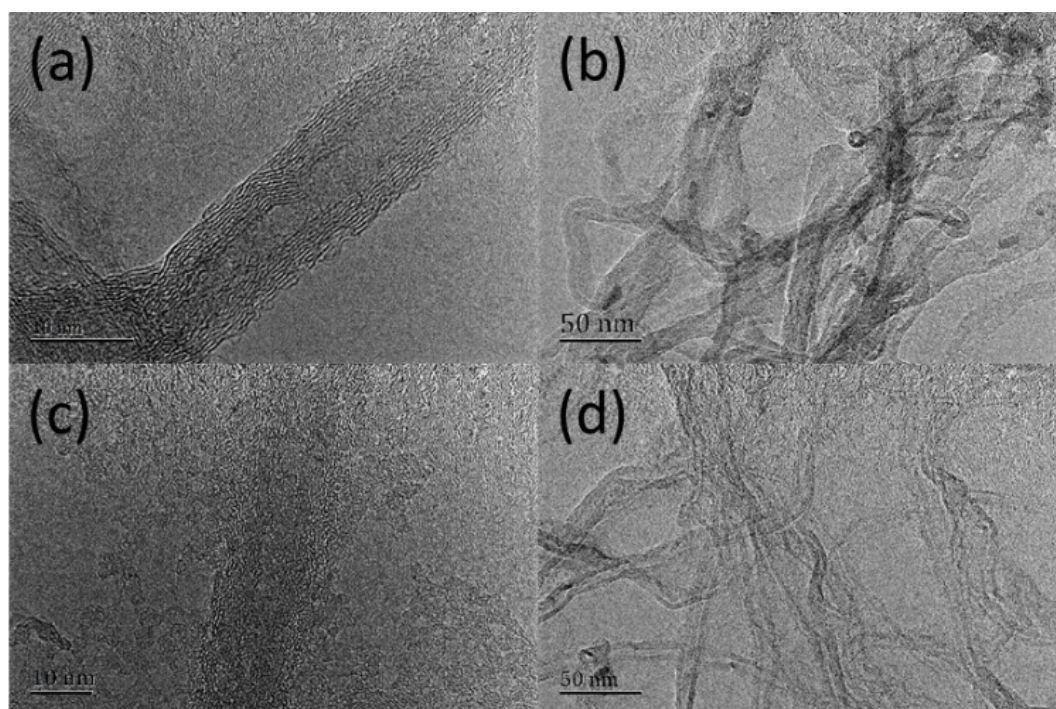

**Fig. S3** TEM images of CNTs without (a, b) and with (c, d) the addition of BCPs

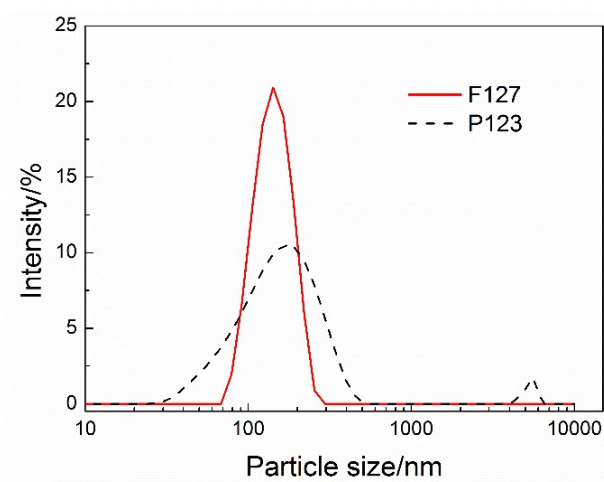

**Fig. S4** Particle size dispersion of CNTs at the mass ratio  $m(\text{BCPs}): m(\text{CNTs})$  of 0.8.

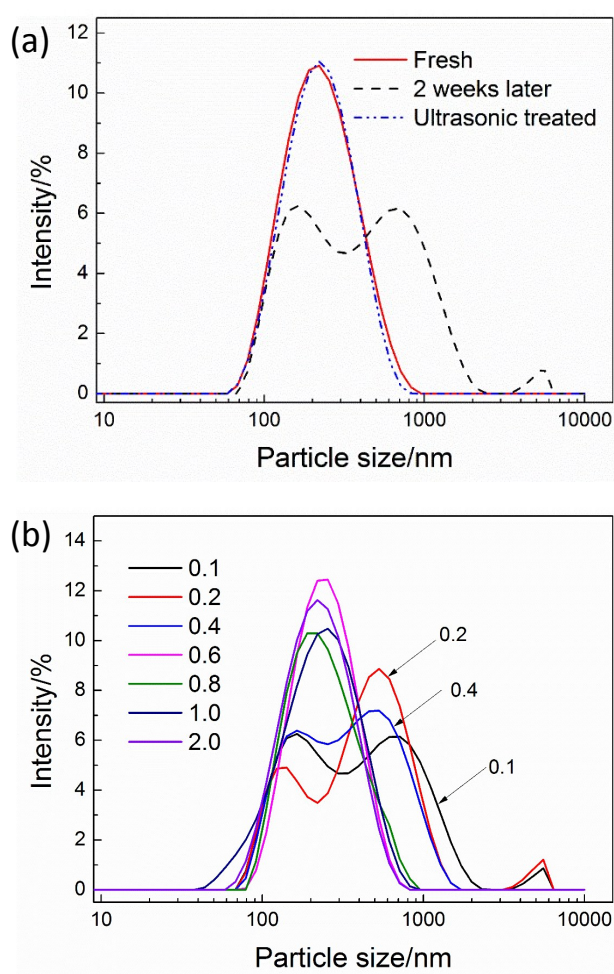

**Fig. S5** (a) Effect of aging and retreatment on the particle size distribution of CNTs dispersion. (b) Effects of F127 adding amount on the particle size distribution of CNTs of 0.02 mg/mL.



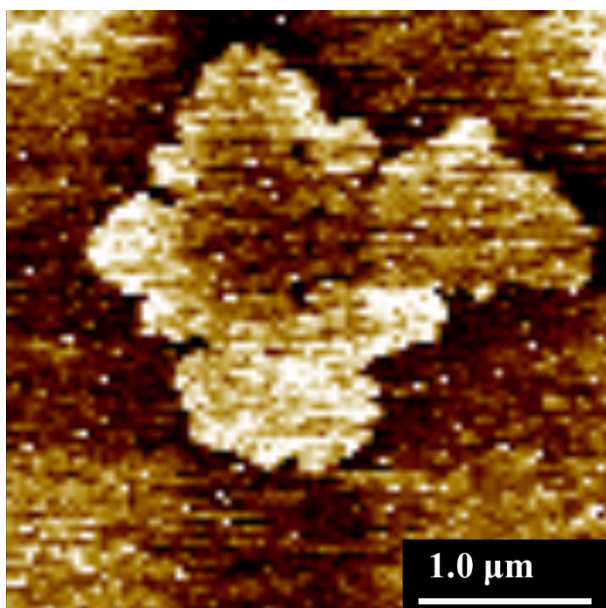

**Fig. S6** AFM image of reduced GO sheet on mica.

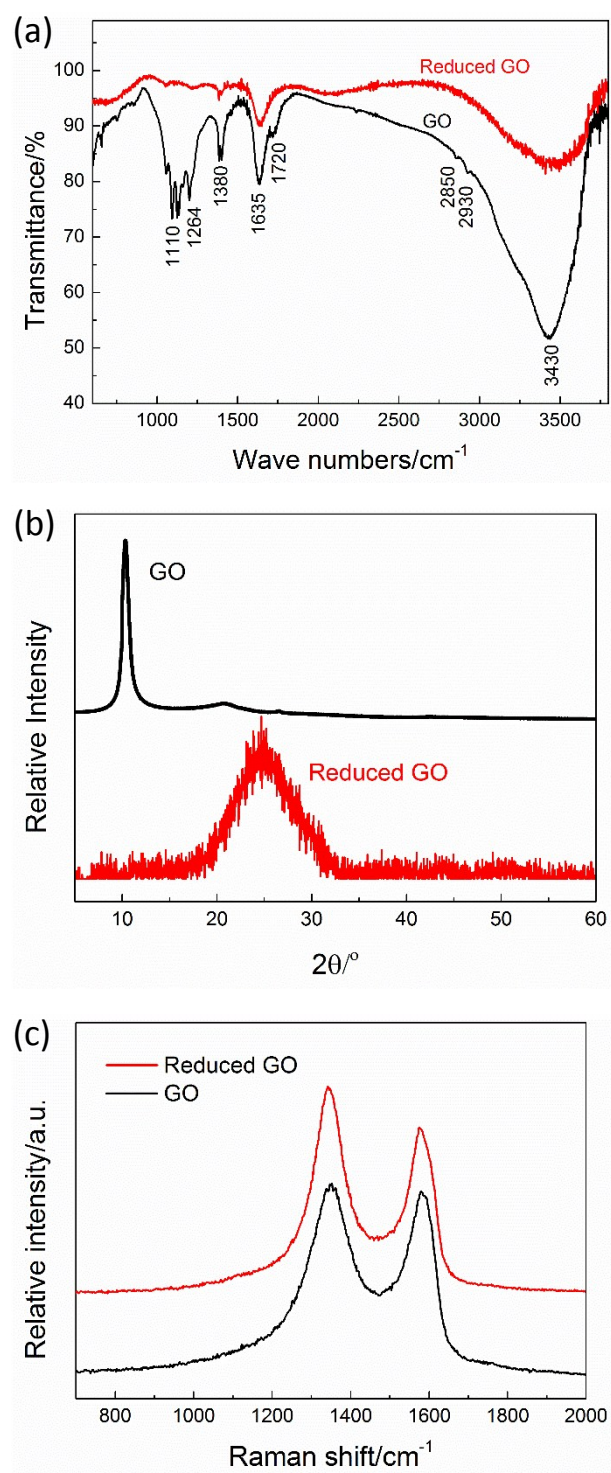

**Fig. S7** (a) FTIR spectrum, (b) XRD spectrum and (c) Raman spectrum of GO and reduced GO.

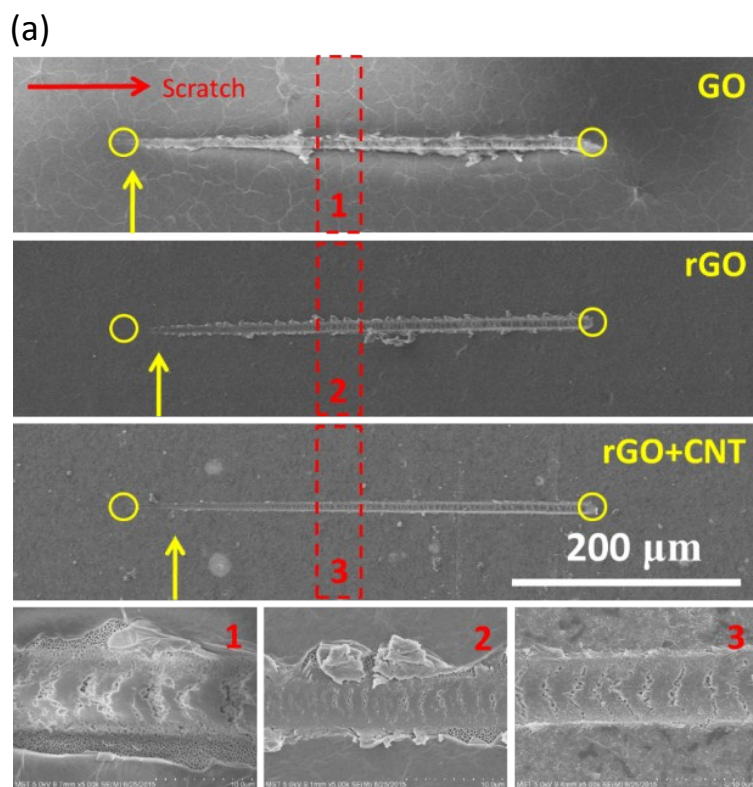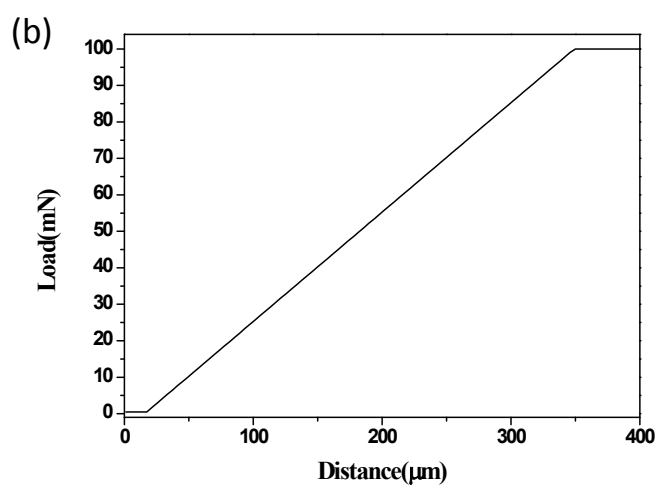

**Fig. S8** (a) Comparison of the microstructure of surface scratches on different graphene-based membranes. (b) The relationship between the load force and the scratch distance.

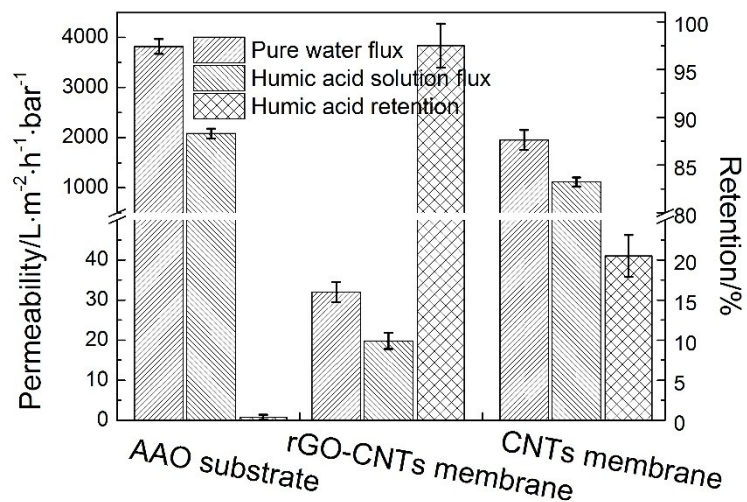

**Fig. S9** Comparison of AAO substrate, rGO-CNTs hybrid NF membrane and CNTs membrane on the permeability and retention performance.

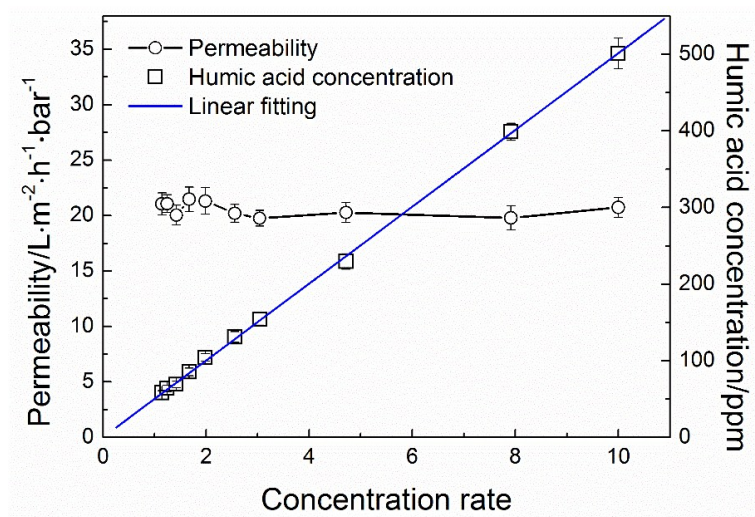

**Fig. S10** Effect of concentration rate on the humic acid concentration in feed side.

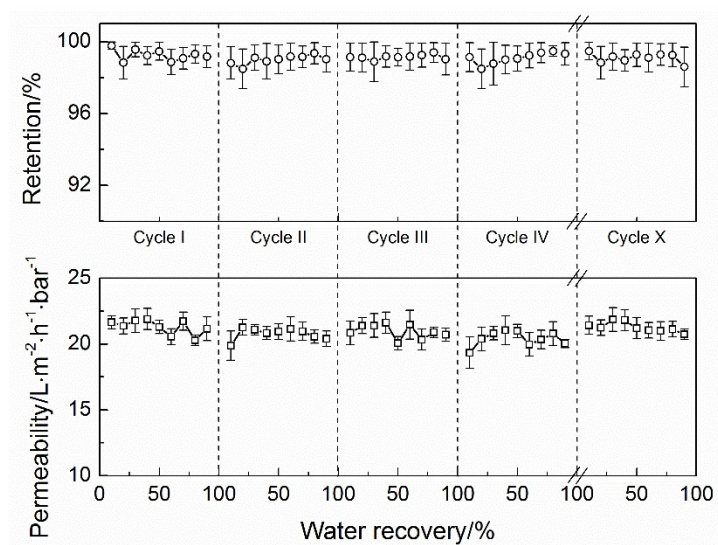



**Fig. S11** Performance of rGO-CNTs hybrid NF membranes for removing humic acid

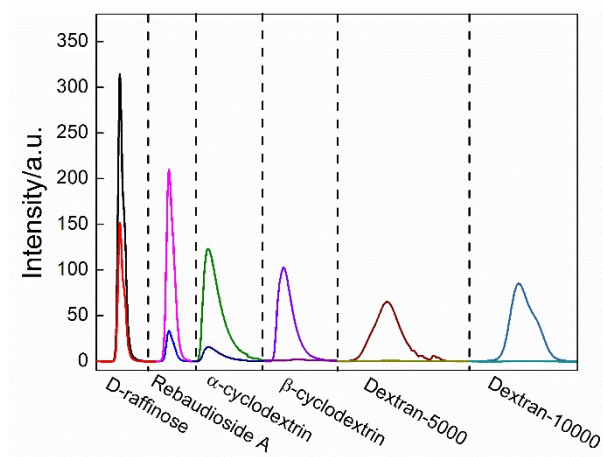

**Fig. S12** Performance of rGO-CNTs hybrid NF membranes for the retention of various sugars.

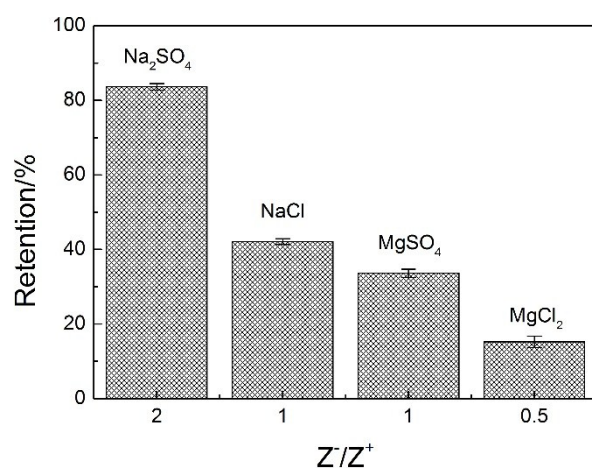

**Fig. S13** Retention properties for different salts with different ion valences.

**Table S1** Performance of rGO-CNT membranes with different CNTs loadings

| Sample name         |                                                                                | GM-1-1 | GM-2-1 | GM-4-1 | GM-8-1 | GM-1-0 |
|---------------------|--------------------------------------------------------------------------------|--------|--------|--------|--------|--------|
| m(rGO):m(CNTs)      | mass ratio                                                                     | 1:1    | 2:1    | 4:1    | 8:1    | 1:0    |
| Pure water          | $J_0 / \text{L} \cdot \text{m}^{-2} \cdot \text{h}^{-1} \cdot \text{bar}^{-1}$ | 96.8   | 31.5   | 12.8   | 3.6    | 0.7    |
| Direct Red 80       | R/%                                                                            | >99    | >99    | >99    | >99    | >99    |
| Chlorazol Fast Pink | R/%                                                                            | 95.3   | >99    | >99    | >99    | >99    |
| Chlorazol Black     | R/%                                                                            | 90.5   | >99    | >99    | >99    | >99    |
| Titan Yellow        | R/%                                                                            | 88.6   | >99    | >99    | >99    | >99    |
| Methyl Orange       | R/%                                                                            | 60.1   | 97.3   | 98.2   | 98.5   | 98.5   |
